# Supplementary material for: Contrasting male and female trends in tobacco-attributed mortality in China: evidence from successive nationwide prospective cohort studies
Source: PubMed Central journal article supplement (PMC4691901; doi:10.1016/s0140-6736(15)00340-2), 2015-10-10
Supplement: mmc1.pdf [file mmc1.pdf]

# THE LANCET

## Supplementary appendix

This appendix formed part of the original submission and has been peer reviewed. We post it as supplied by the authors.

Supplement to: Chen Z, Peto R, Zhou M, et al, for the China Kadoorie Biobank (CKB) collaborative group. Contrasting male and female trends in tobacco-attributed mortality in China: evidence from successive nationwide prospective cohort studies. *Lancet* 2015; **386**: 1447–56.

## Online Appendix contents list; click on any item to jump to it

### *Page 3*

Webtable 1: ICD codes for specific causes of death

### *Page 4*

Webtable 2: Numbers of deaths at age 40-79, RRs and proportions of deaths attributed to smoking among men in the first (CPSS, 1991-99) and men and women in the second study (CKB, 2006-14)

### *Page 5*

Webtable 3: Baseline characteristics of men at age 40-79 in the first (CPSS, 1991) versus second study (CKB, 2004-08)

### *Page 6*

Webfigure 1: Adjusted rate ratios for all-cause mortality in men, by area, in the second study (CKB, 2006-14)

### *Page 7*

Webfigure 2: Ex- versus never-smoker all-cause mortality rate ratio, by years stopped smoking and reason stopped, for men in both studies combined

### *Page 8*

Webfigure 3: Changing Chinese male lung cancer mortality, 1995-2010, among ever-smokers and never-smokers in two nationally representative prospective studies about 15 years apart

### *Page 9*

Webfigure 4: Chinese never-smoker lung cancer death rates by age and sex in two successive prospective studies 15 years apart (1991-99 and 2006-14)

### *Page 10*

Webfigure 5: US never-smoker lung cancer mortality rates by age and sex in the American Cancer Society's Second Cancer Prevention Study, CPS-II, during years 3-6 of the prospective follow-up (approximately 1984-88)

**Webtable 1: ICD codes for specific causes of death** \_

| Category                                                                  | ICD-9                              | ICD-10                        |
|---------------------------------------------------------------------------|------------------------------------|-------------------------------|
| Lung cancer (including trachea)                                           | 162                                | C33-C34                       |
| Liver cancer                                                              | 155                                | C22                           |
| Stomach cancer                                                            | 151                                | C16                           |
| Oesophagus cancer                                                         | 150                                | C15                           |
| Five minor sites (Lip/oral cavity, larynx, pharynx, pancreas and bladder) | 140-149, 157, 161, 188             | C00-C14, C25, C32, C67        |
| Cancer, other or unknown                                                  | Rest of 140-208                    | Rest of C00-C97               |
| <b>All cancer</b>                                                         | <b>140-208</b>                     | <b>C00-C97</b>                |
| Ischaemic heart disease                                                   | 410-414                            | I20-I25                       |
| Ischaemic stroke                                                          | 433-435                            | I63                           |
| Haemorrhagic stroke                                                       | 430-432                            | I61                           |
| Other or unknown type of stroke                                           | 436-438                            | Rest of I60-I69               |
| Other cardiovascular                                                      | Rest of 410-438, exc. 415-417      | Rest of I00-I99, exc. I26-I27 |
| <b>All vascular</b>                                                       | <b>410-438, exc. 415-417</b>       | <b>I00-I99 exc. I26-I27</b>   |
| COPD                                                                      | 490-496, 415-417                   | J40-J44, I26-I27              |
| Other respiratory                                                         | Rest of 460-519                    | Rest of J00-J99               |
| <b>All respiratory</b>                                                    | <b>460-519, 415-417</b>            | <b>J00-J99, I26-I27</b>       |
| <b>All other medical</b>                                                  | <b>Rest of 001-799</b>             | <b>Rest of A00-R99</b>        |
| <b>All non-medical</b>                                                    | <b>800-999, E800-E999, V01-V82</b> | <b>V01-Y98</b>                |

**Webtable 2: Number of deaths at age 40-79, mortality RRs and proportion of deaths attributed to smoking among men in ~1995 (CPSS, 1991-99) and men and women in ~2010 (CKB, 2006-14)**

| Cause of deaths           | CPSS men only<br>(First study, 1991-99)          |                             |                         | CKB men<br>(Second study, 2006-14)               |                             |                         | CKB women<br>(Second study, 2006-14)             |                             |                         |
|---------------------------|--------------------------------------------------|-----------------------------|-------------------------|--------------------------------------------------|-----------------------------|-------------------------|--------------------------------------------------|-----------------------------|-------------------------|
|                           | No of deaths<br>Smokers/Non-smokers <sup>*</sup> | RR <sup>†</sup><br>(95% CI) | PAF <sup>‡</sup><br>(%) | No of deaths<br>Smokers/Non-smokers <sup>*</sup> | RR <sup>†</sup><br>(95% CI) | PAF <sup>‡</sup><br>(%) | No of deaths<br>Smokers/Non-smokers <sup>*</sup> | RR <sup>†</sup><br>(95% CI) | PAF <sup>‡</sup><br>(%) |
| Lung cancer               | 1024/232                                         | 1.95 (1.68 - 2.26)          | 39                      | 1073/161                                         | 2.58 (2.17 - 3.05)          | 51                      | 101/618                                          | 2.56 (2.02 - 3.26)          | 9                       |
| Liver cancer              | 977/374                                          | 1.06 (0.93 - 1.20)          | 3                       | 644/176                                          | 1.26 (1.06 - 1.50)          | 16                      | 31/382                                           | 1.40 (0.93 - 2.12)          | 2                       |
| Stomach cancer            | 870/273                                          | 1.22 (1.06 - 1.41)          | 14                      | 602/170                                          | 1.25 (1.05 - 1.49)          | 14                      | 26/334                                           | 1.43 (0.92 - 2.23)          | 2                       |
| Oesophagus cancer         | 662/233                                          | 1.18 (1.01 - 1.38)          | 11                      | 567/124                                          | 1.58 (1.30 - 1.93)          | 28                      | 13/236                                           | 1.05 (0.55 - 2.01)          | 0                       |
| Five minor sites          | 215/78                                           | 1.18 (0.90 - 1.54)          | 11                      | 282/62                                           | 1.53 (1.15 - 2.04)          | 27                      | 14/210                                           | 0.98 (0.55 - 1.75)          | -1                      |
| <b>All cancer</b>         | <b>4201/1352</b>                                 | <b>1.28 (1.20 - 1.36)</b>   | <b>16</b>               | <b>3811/913</b>                                  | <b>1.51 (1.40 - 1.63)</b>   | <b>26</b>               | <b>272/3037</b>                                  | <b>1.58 (1.37 - 1.81)</b>   | <b>3</b>                |
| IHD                       | 1172/406                                         | 1.26 (1.12 - 1.42)          | 16                      | 1261/426                                         | 1.38 (1.23 - 1.54)          | 19                      | 130/1212                                         | 1.74 (1.42 - 2.12)          | 5                       |
| Ischaemic stroke          | 817/333                                          | 1.11 (0.97 - 1.27)          | 7                       | 395/132                                          | 1.41 (1.15 - 1.73)          | 19                      | 25/353                                           | 1.15 (0.74 - 1.78)          | 1                       |
| Haemorrhagic stroke       | 2437/816                                         | 1.06 (0.98 - 1.16)          | 5                       | 1251/397                                         | 1.03 (0.92 - 1.16)          | 1                       | 88/1262                                          | 1.09 (0.86 - 1.39)          | 1                       |
| <b>All cardiovascular</b> | <b>6277/2203</b>                                 | <b>1.12 (1.07 - 1.18)</b>   | <b>8</b>                | <b>3578/1193</b>                                 | <b>1.24 (1.16 - 1.33)</b>   | <b>13</b>               | <b>319/3530</b>                                  | <b>1.44 (1.27 - 1.63)</b>   | <b>3</b>                |
| <b>All respiratory</b>    | <b>5193/1504</b>                                 | <b>1.27 (1.20 - 1.35)</b>   | <b>16</b>               | <b>1068/244</b>                                  | <b>1.64 (1.42 - 1.90)</b>   | <b>31</b>               | <b>159/710</b>                                   | <b>1.78 (1.46 - 2.17)</b>   | <b>8</b>                |
| <b>All other medical</b>  | <b>2055/752</b>                                  | <b>1.07 (0.98 - 1.17)</b>   | <b>5</b>                | <b>1062/360</b>                                  | <b>1.20 (1.06 - 1.36)</b>   | <b>12</b>               | <b>110/1133</b>                                  | <b>1.41 (1.13 - 1.76)</b>   | <b>3</b>                |
| <b>All causes</b>         | <b>18875/6236</b>                                | <b>1.17 (1.14 - 1.21)</b>   | <b>11</b>               | <b>10326/2955</b>                                | <b>1.33 (1.28 - 1.39)</b>   | <b>18</b>               | <b>897/9037</b>                                  | <b>1.51 (1.40 - 1.63)</b>   | <b>3</b>                |

\* Excludes 4306 and 15,271 (14,080 male) ever regular smokers who stopped smoking by choice in CPSS and CKB respectively.

† Rate ratios (RRs) were all adjusted for area and age at risk (strata), education and alcohol. Additional adjustment for SBP ((1.18 [1.16-1.20], 1.35 [1.32-1.37], 1.56 [1.46-1.67] for, respectively CPSS men, CKB men and CKB women), for BMI ((1.15 [1.13-1.17], 1.30 [1.27-1.32], 1.48 [1.39-1.58] for, respectively CPSS men, CKB men and CKB women) and for SBP and BMI ((1.15 [1.13-1.17], 1.30 [1.27-1.33], 1.53 [1.43-1.63] for, respectively CPSS men, CKB men and CKB women) hardly changed the RRs for overall mortality.

‡ In estimating Population Attributable Fraction (PAF) for ever regular smoking, the RR used is for all ever regular smokers including those who stopped by choice.

**Webtable 3: Baseline characteristics of men at age 40-79 in the first (CPSS, 1991) versus second study (CKB, 2004-08)**

| Characteristics                                            | CPSS<br>(n=219,893) | CKB*<br>(n=180,658) |
|------------------------------------------------------------|---------------------|---------------------|
| % urban                                                    | 27.1                | 43.7                |
| Year of baseline survey (median)                           | 1991                | 2006                |
| Year of birth (median)                                     | 1938                | 1952                |
| <b>Age at baseline (%)</b>                                 |                     |                     |
| 40-49                                                      | 37.8                | 32.8                |
| 50-59                                                      | 31.6                | 35.3                |
| 60-69                                                      | 21.4                | 22.9                |
| 70-79                                                      | 9.2                 | 9.1                 |
| Mean age (years)                                           | 54.8                | 55.4                |
| <b>Highest education (%)</b>                               |                     |                     |
| None                                                       | 22.7                | 10.0                |
| Primary                                                    | 44.2                | 35.5                |
| Secondary                                                  | 27.8                | 47.4                |
| Tertiary                                                   | 5.3                 | 7.0                 |
| <b>Current alcohol drinking in most weeks (%)</b>          | 33.4                | 33.2                |
| <b>Smoking category (%)</b>                                |                     |                     |
| Never smoked regularly                                     | 26.8                | 24.7                |
| Ex-smoker (stopped by choice)                              | 2.0                 | 7.2                 |
| <i>[Ex-smoker (stopped by choice) as % of ever-smoker]</i> | <i>[2.7]</i>        | <i>[9.6]</i>        |
| Smoker (current smoker or stopped because ill)             | 71.2                | 68.1                |
| – Current smoker                                           | 67.4                | 60.8                |
| – Stopped because ill                                      | 3.8                 | 7.3                 |
| <b>Patterns among smokers #</b>                            |                     |                     |
| <b>Age started (%)</b>                                     |                     |                     |
| <20                                                        | 30.2                | 32.2                |
| 20-24                                                      | 41.6                | 37.2                |
| ≥25                                                        | 28.2                | 30.6                |
| <b>First started on cigarettes, by birth year (%)</b>      |                     |                     |
| <1925                                                      | 41.5                | —                   |
| 1925-1934                                                  | 52.0                | 56.8                |
| 1935-1944                                                  | 60.1                | 64.0                |
| 1945-1954                                                  | 69.1                | 75.2                |
| ≥1955                                                      | —                   | 89.2                |
| <b>Last smoked cigarettes only, by age (%)</b>             |                     |                     |
| 40-49                                                      | 67.8                | 92.9                |
| 50-59                                                      | 54.9                | 83.0                |
| 60-69                                                      | 43.2                | 73.2                |
| 70-79                                                      | 31.5                | 71.4                |
| Any age                                                    | 55.4                | 83.4                |
| Mean cigarettes/day/pure cigarette smoker of any age       | 16.9                | 18.1                |

\* Excluded 29,564 men aged <40 at entry

# Current smoker or stopped because ill

**Webfigure 1: Adjusted rate ratios for all-cause mortality in men, by area, in the second prospective study (CKB, 2006–14)**

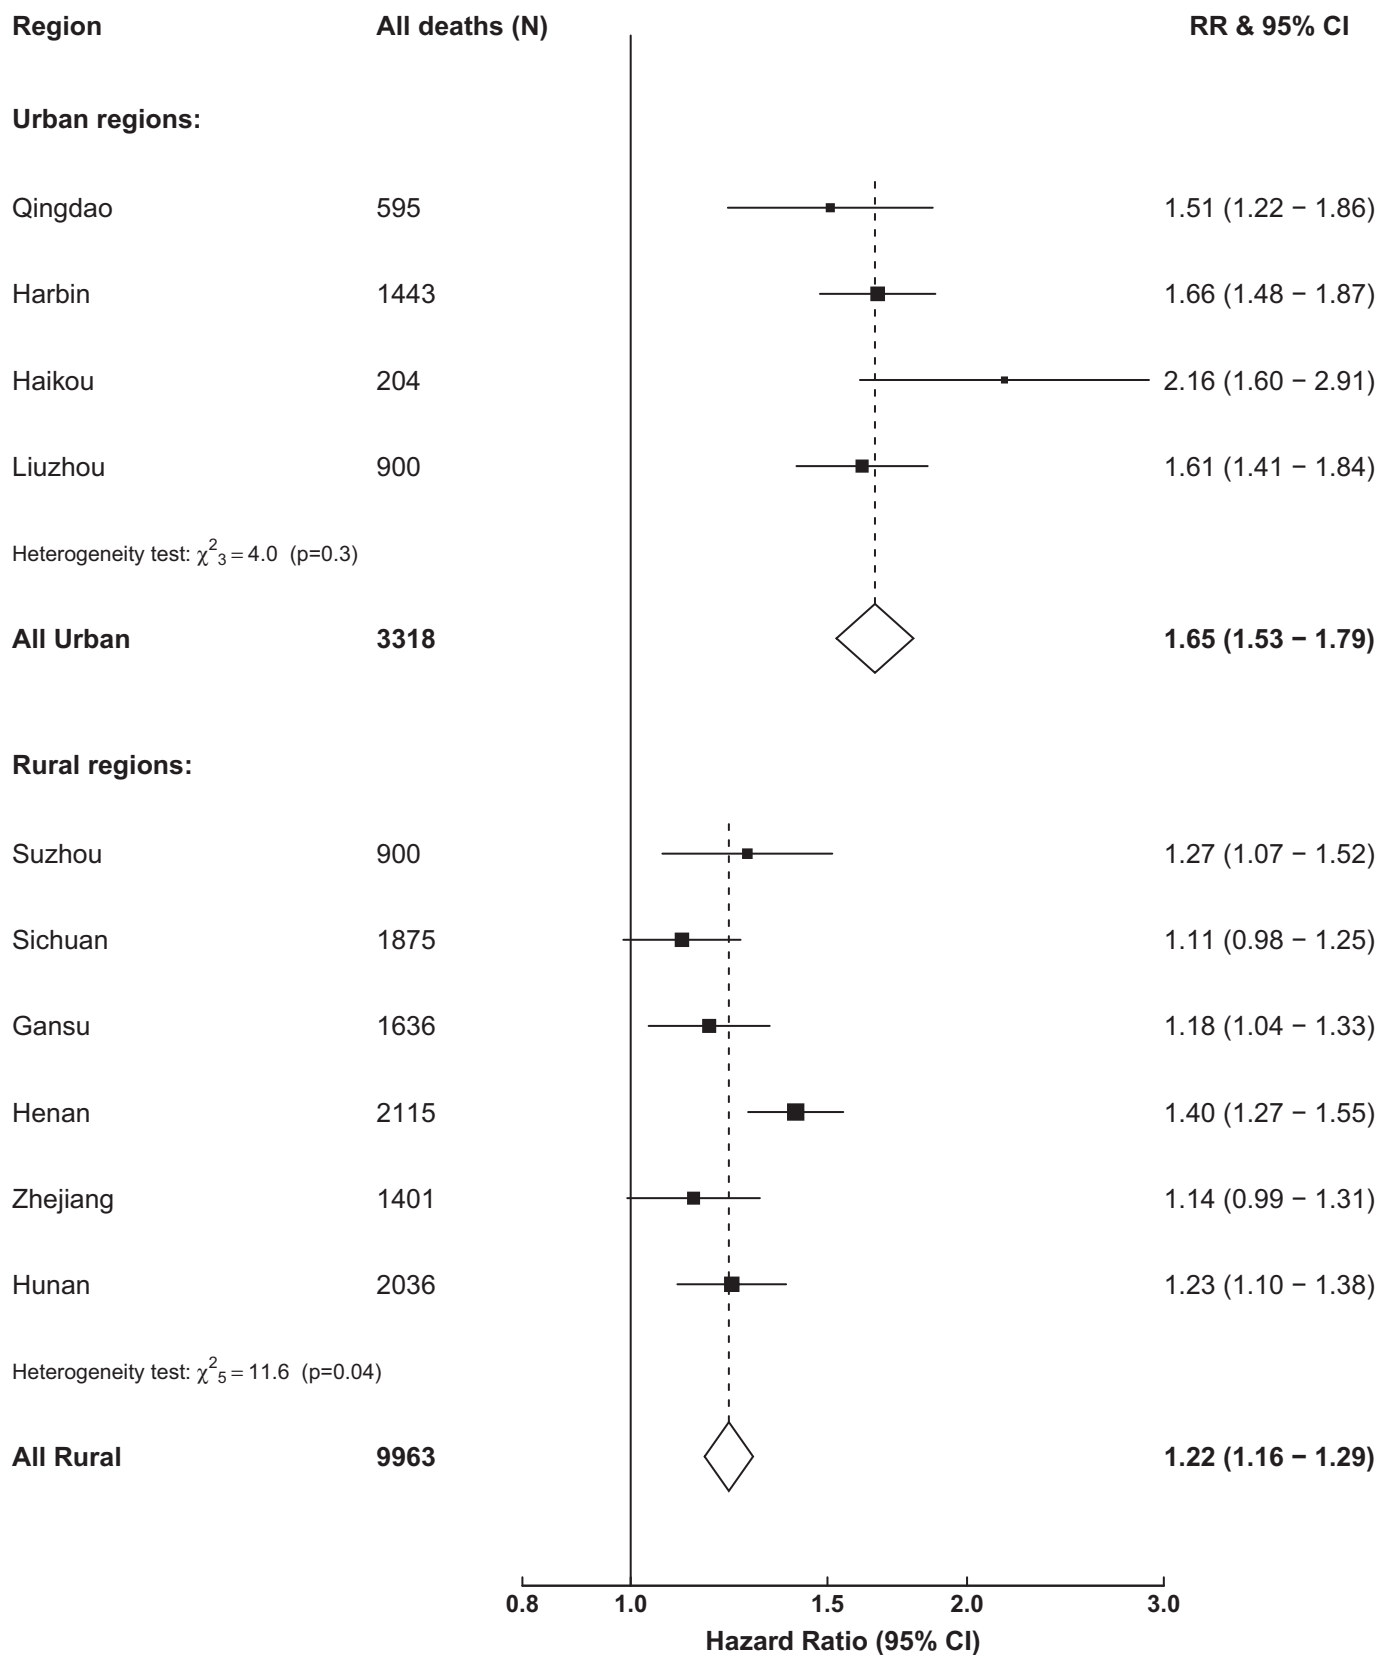

## Webfigure 2: Ex- versus never-smoker all-cause mortality rate ratio, by years stopped smoking and reason stopped; men in both studies

Each group-specific CI (including that for never-smokers, given by the width of the shaded strip) reflects the variance of the log risk in that 1 group, so comparisons use variances from >1 group.

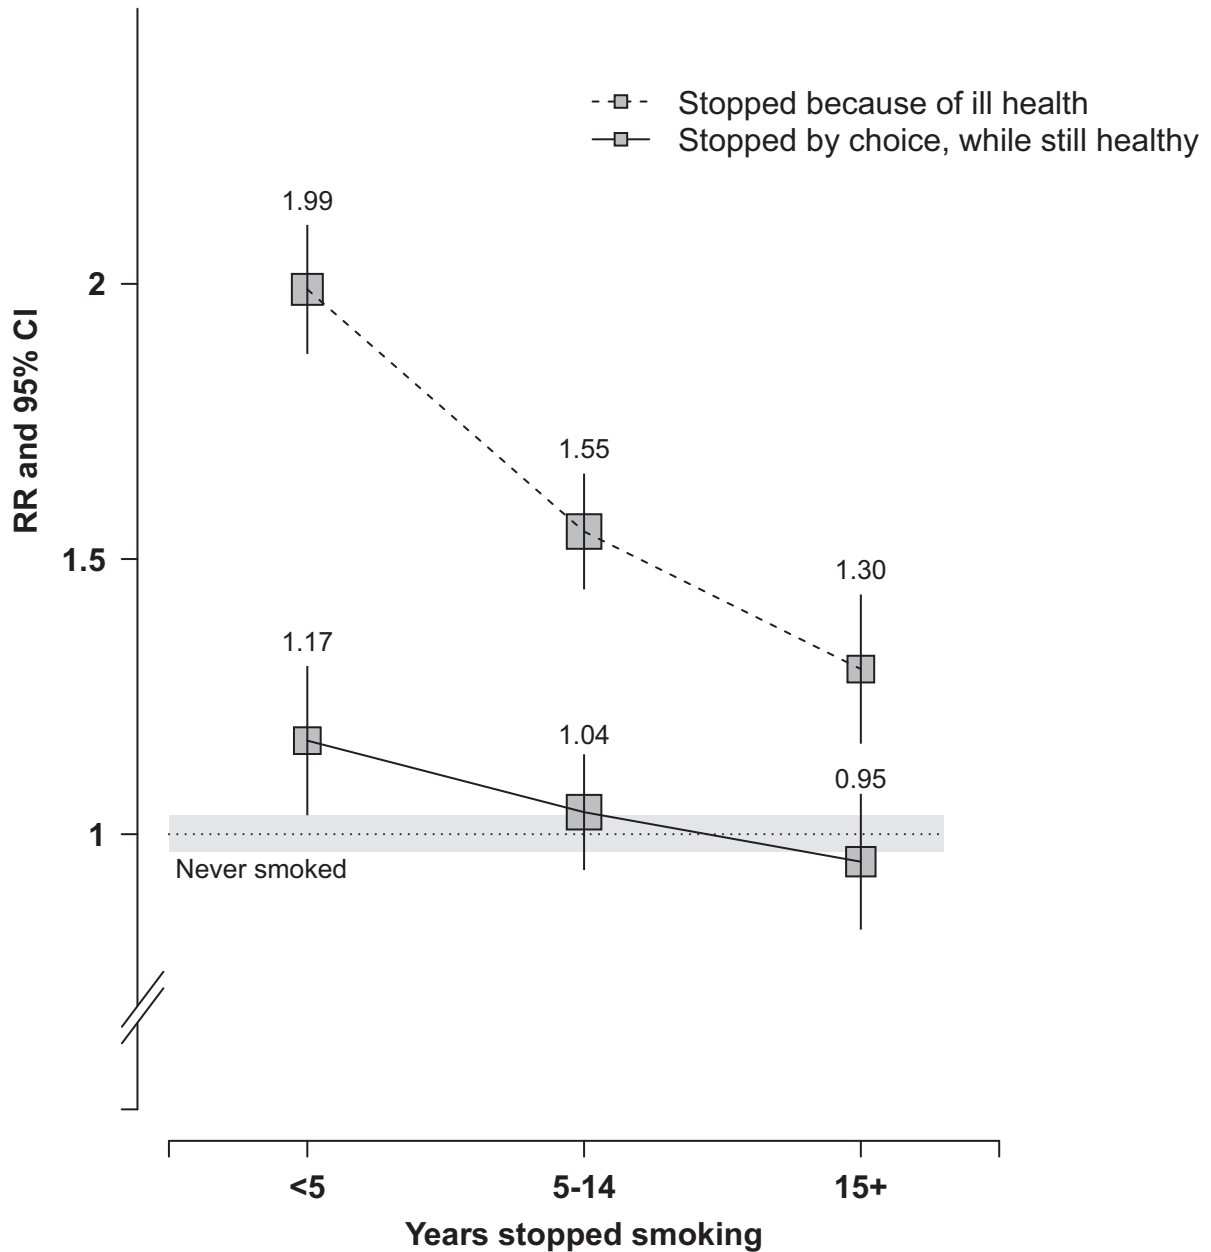

**Webfigure 3: Changing Chinese male lung cancer mortality, 1995-2010, among ever-smokers and never-smokers in two nationally representative prospective studies about 15 years apart**

NB: Rates in later middle age are increasing in Chinese smokers, decreasing in Chinese never-smokers, and roughly constant in US never-smokers. CKB, Chinese Kadoorie Biobank, follow-up ~2006-2014; CPSS, Chinese Prospective Smoking Study, follow-up ~1991-1999; USA, ACS CPS-II, follow-up 1984-1988 [3]. Non-smoker rates: webtables 4-5.

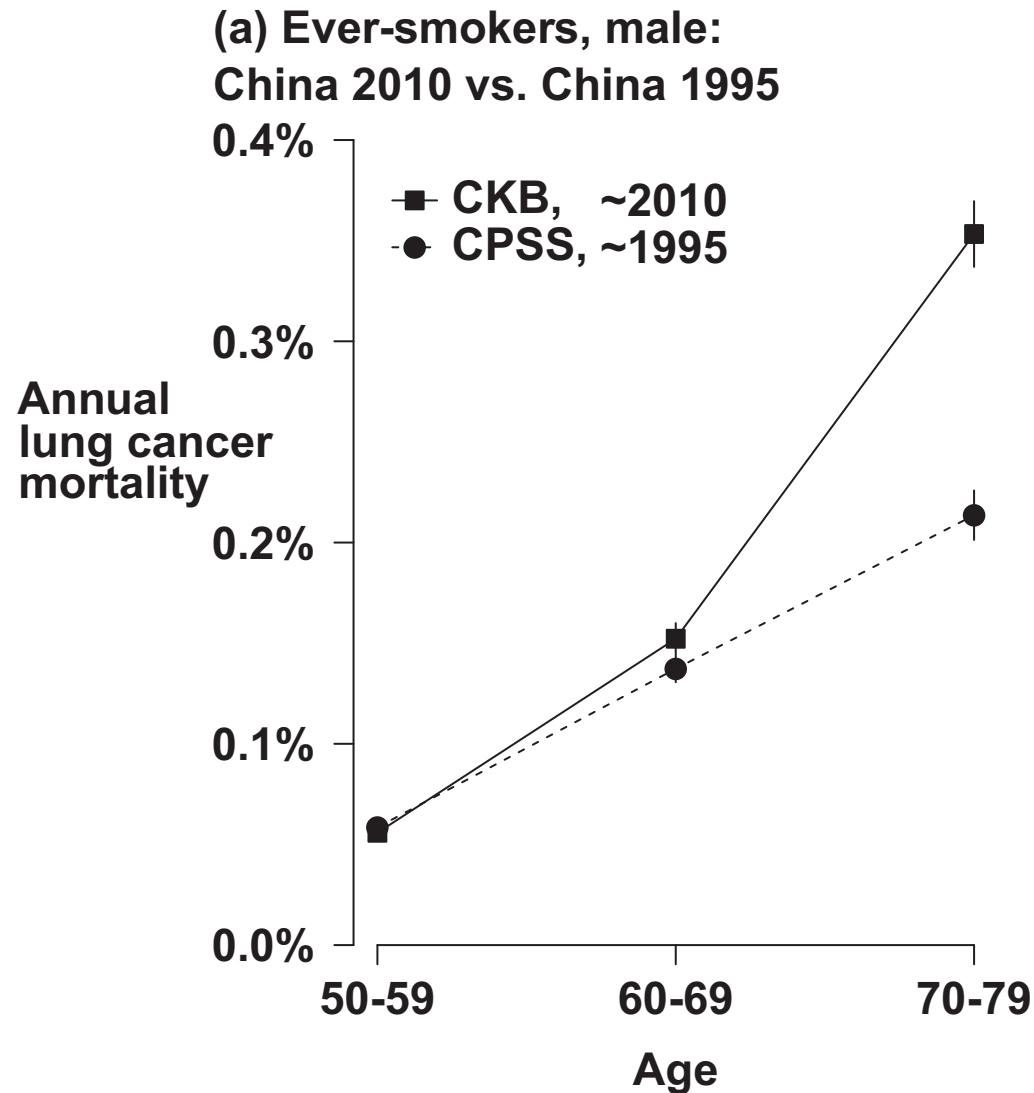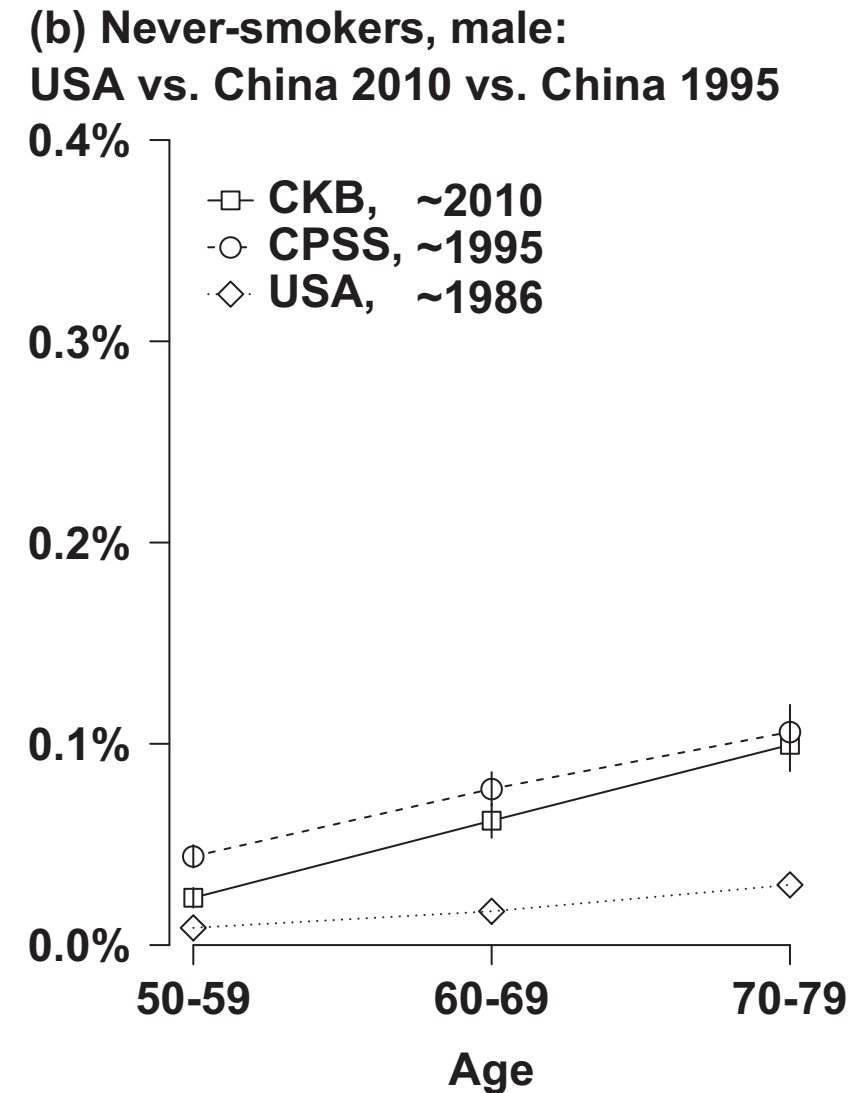



**Webtable 4: Chinese never-smoker lung cancer death rates by age and sex in two successive prospective studies 15 years apart (1991-99 and 2006-14)**

| Age at risk<br>(in years)      | Male, 1991-99<br>(mid-year 1995) |                   |                  | Male, 2006-14<br>(mid-year 2010) |                   |                  | Female, 2006-14<br>(mid-year 2010) |                   |                  |
|--------------------------------|----------------------------------|-------------------|------------------|----------------------------------|-------------------|------------------|------------------------------------|-------------------|------------------|
|                                | Person<br>years                  | Lung ca<br>deaths | Rate /<br>100000 | Person<br>years                  | Lung ca<br>deaths | Rate /<br>100000 | Person<br>years                    | Lung ca<br>deaths | Rate /<br>100000 |
| <b>40-44</b>                   | 32391                            | 5                 | <b>18</b>        | 56656                            | 6                 | <b>10</b>        | 321656                             | 10                | <b>8</b>         |
| <b>45-49</b>                   | 76630                            | 16                |                  | 52234                            | 5                 |                  | 341274                             | 45                |                  |
| <b>50-54</b>                   | 71812                            | 31                | <b>44</b>        | 46190                            | 7                 | <b>26</b>        | 328126                             | 51                | <b>21</b>        |
| <b>55-59</b>                   | 68713                            | 31                |                  | 51852                            | 19                |                  | 350710                             | 91                |                  |
| <b>60-64</b>                   | 62924                            | 46                | <b>78</b>        | 46243                            | 22                | <b>66</b>        | 259817                             | 99                | <b>54</b>        |
| <b>65-69</b>                   | 49204                            | 41                |                  | 39430                            | 33                |                  | 176555                             | 123               |                  |
| <b>70-74</b>                   | 35752                            | 34                | <b>109</b>       | 36527                            | 37                | <b>125</b>       | 131322                             | 116               | <b>107</b>       |
| <b>75-79</b>                   | 22810                            | 28                |                  | 21490                            | 32                |                  | 65702                              | 83                |                  |
| <b>Total, by<br/>summation</b> | 420235                           | 232               |                  | 350621                           | 161               |                  | 1975162                            | 618               |                  |

Never-smokers include those who reported at baseline having smoked occasionally, but never regularly.

The crude rate in each age group is  $100,000 \times \text{the number of lung cancer deaths} / \text{person-years}$ .

The rate in each 10-year age group is the mean of the two crude rates in the component 5-year age groups.

**Webtable 5: US never-smoker lung cancer mortality rates by age and sex in the American Cancer Society's Second Cancer Prevention Study, CPS-II, during years 3-6 of the prospective follow-up (approximately 1984-88)**

| Age at risk<br>(in years) | Male, 1984-88<br>(mid-year 1986) |                                           |           | Female, 1984-88<br>(mid-year 1986) |                                           |           |
|---------------------------|----------------------------------|-------------------------------------------|-----------|------------------------------------|-------------------------------------------|-----------|
|                           | Person<br>years                  | Annual lung cancer<br>mortality / 100,000 |           | Person<br>years                    | Annual lung cancer<br>mortality / 100,000 |           |
|                           |                                  | Crude rate                                | Smoothed  |                                    | Crude rate                                | Smoothed  |
| <b>35-39</b>              | 14560                            | 7                                         | <b>2</b>  | 30810                              | 3                                         | <b>2</b>  |
| <b>40-44</b>              | 13930                            | 0                                         | <b>3</b>  | 45760                              | 0                                         | <b>3</b>  |
| <b>45-49</b>              | 32110                            | 9                                         | <b>5</b>  | 116870                             | 4                                         | <b>4</b>  |
| <b>50-54</b>              | 81410                            | 5                                         | <b>7</b>  | 196520                             | 5                                         | <b>7</b>  |
| <b>55-59</b>              | 87920                            | 3                                         | <b>10</b> | 224110                             | 8                                         | <b>10</b> |
| <b>60-64</b>              | 80570                            | 11                                        | <b>14</b> | 227400                             | 14                                        | <b>14</b> |
| <b>65-69</b>              | 69670                            | 24                                        | <b>20</b> | 192560                             | 18                                        | <b>19</b> |
| <b>70-74</b>              | 50530                            | 36                                        | <b>27</b> | 143280                             | 28                                        | <b>26</b> |
| <b>75-79</b>              | 28880                            | 38                                        | <b>35</b> | 95900                              | 42                                        | <b>34</b> |

Source: Appendix to Reference (3). Never-smoker means replied "never smoked regularly" at baseline survey.

The crude rate in each age group is  $100,000 \times$  the number of lung cancer deaths / person-years.

Smoothing the lung cancer mortality rates in the 5-year age groups with lower limits 35, 40, ... , 75 involved obtaining the best-fitting line of slope 4 on a logarithmic graph of the crude rates vs these lower age limits; then, in Webfigure 3, the US rates at ages 50-59, 60-69 and 70-79 are each the mean of two smoothed rates.
